# Supplementary material for: Large-current-stable bifunctional nanoporous Fe-rich nitride electrocatalysts for highly efficient overall water and urea splitting
Source: Royal Society of Chemistry journal article supplement (doi:10.1039/d1ta00144b), 2021-01-01
Supplement: d1ta00144b1.pdf [file d1ta00144b1.pdf]

## Supporting Information

### Large-current-stable bifunctional nanoporous Fe-rich nitride electrocatalysts for highly efficient overall water and urea splitting

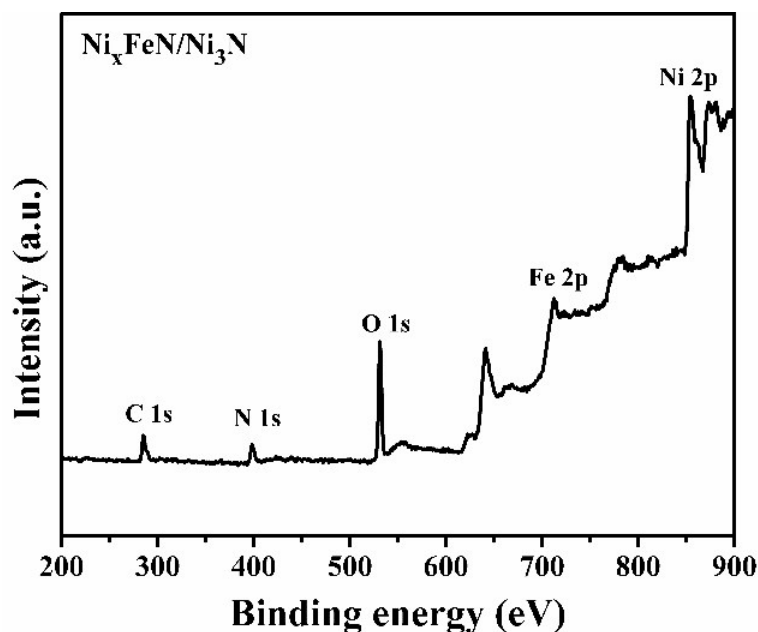

**Figure S1.** XPS survey spectrum of the as-prepared  $\text{Ni}_x\text{FeN}/\text{Ni}_3\text{N}$  hybrid on Ni foam.

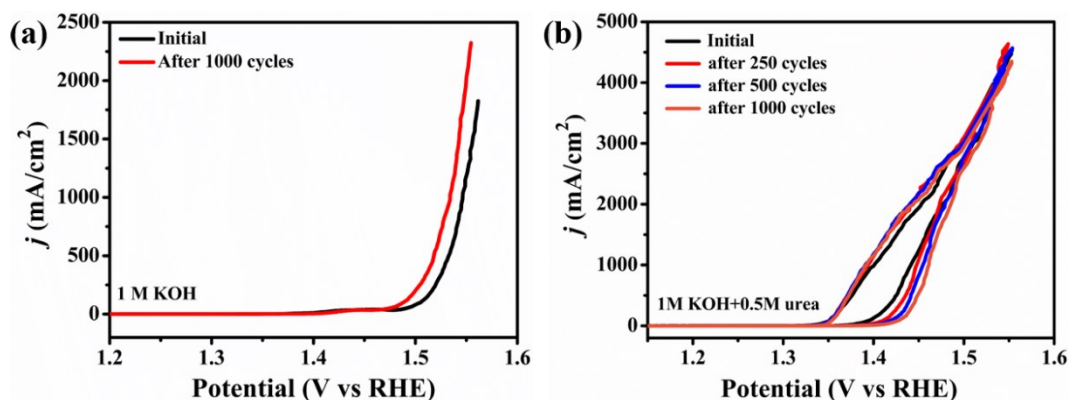

**Figure S2.** (a) The polarization curves for OER in 1M KOH and (b) cyclic voltammetry curves of the  $\text{Ni}_x\text{FeN}/\text{Ni}_3\text{N}$  catalysts for UOR in 1M KOH + 0.5M urea.

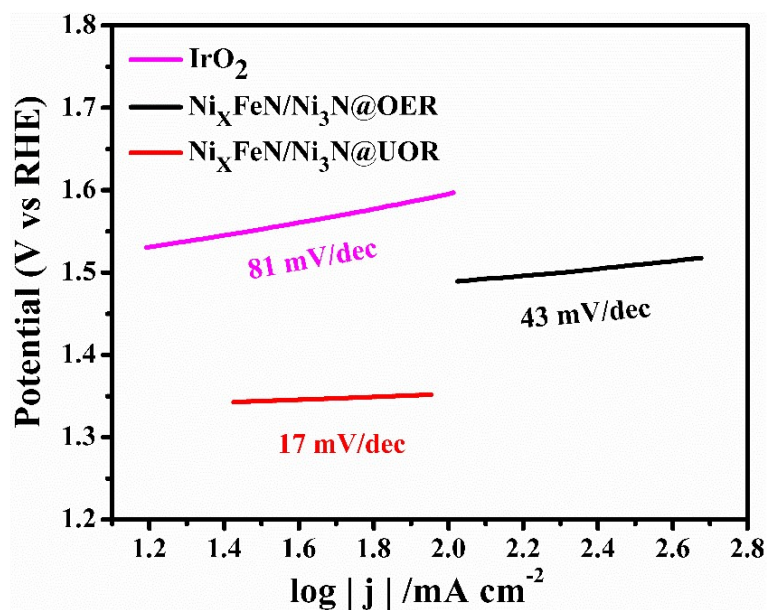

**Figure S3.** Tafel plots for the OER and UOR derived from corresponding polarization curve.

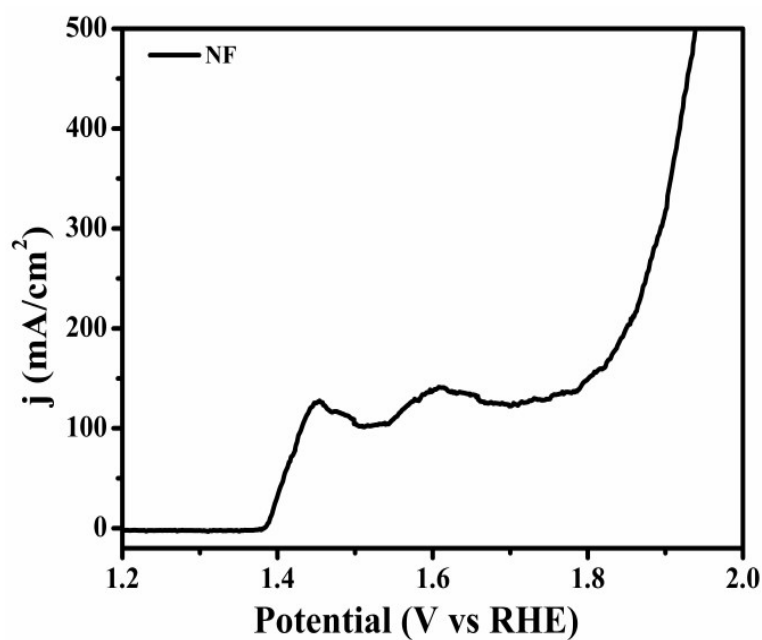

**Figure S4.** A steady-state potential polarization curve recorded on a piece of Ni foam in 1M KOH with 0.5M urea.

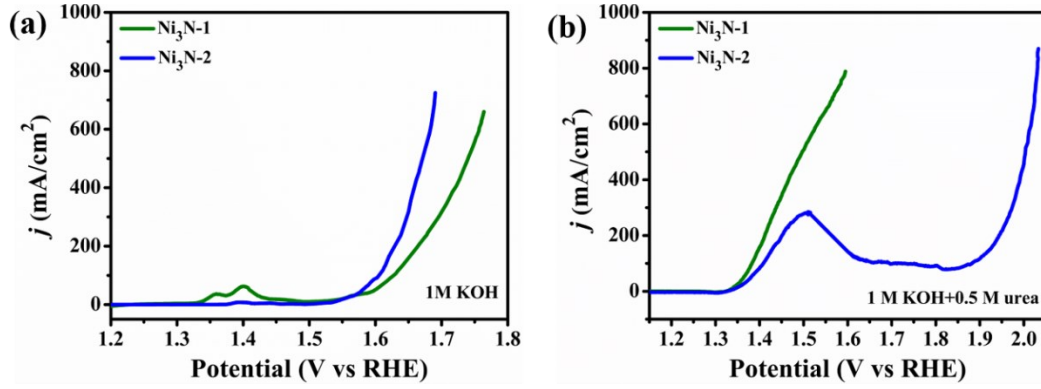

**Figure S5.** The polarization curves of the Ni<sub>3</sub>N-1 and Ni<sub>3</sub>N-2 catalysts for the OER in 1M KOH (a) and UOR in 1M KOH + 0.5M urea (b).

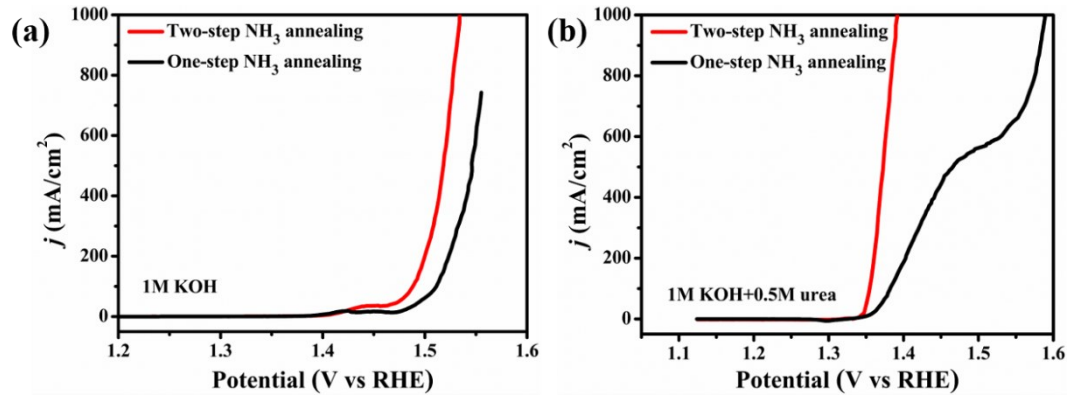

**Figure S6.** The comparison on the polarization curves of the Ni<sub>x</sub>FeN/Ni<sub>3</sub>N hybrid electrocatalyst using one- and two-step nitridation. (a) OER in 1M KOH. (b) UOR in 1M KOH containing 0.5M urea.

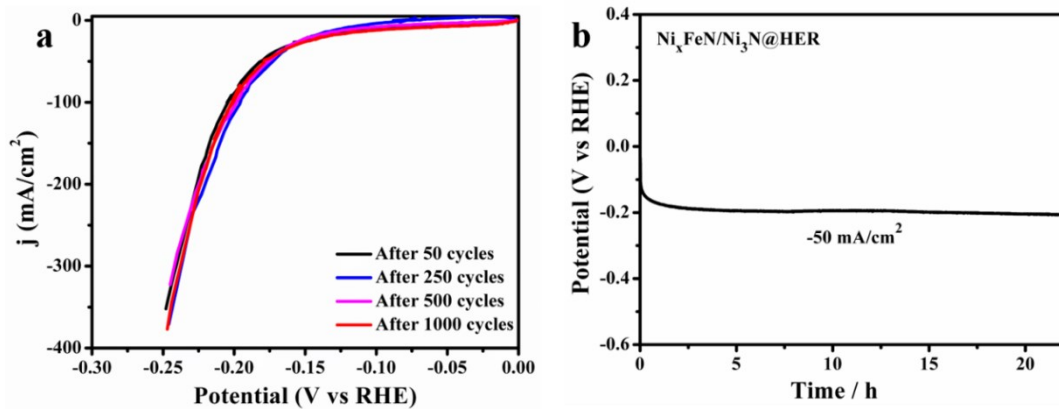

**Figure S7.** (a) The HER polarization curves of  $\text{Ni}_x\text{FeN}/\text{Ni}_3\text{N}$  in 1M KOH. (b) Chronopotentiometry test at a current density of  $50 \text{ mA}/\text{cm}^2$  for  $\text{Ni}_x\text{FeN}/\text{Ni}_3\text{N}$  in alkaline medium.

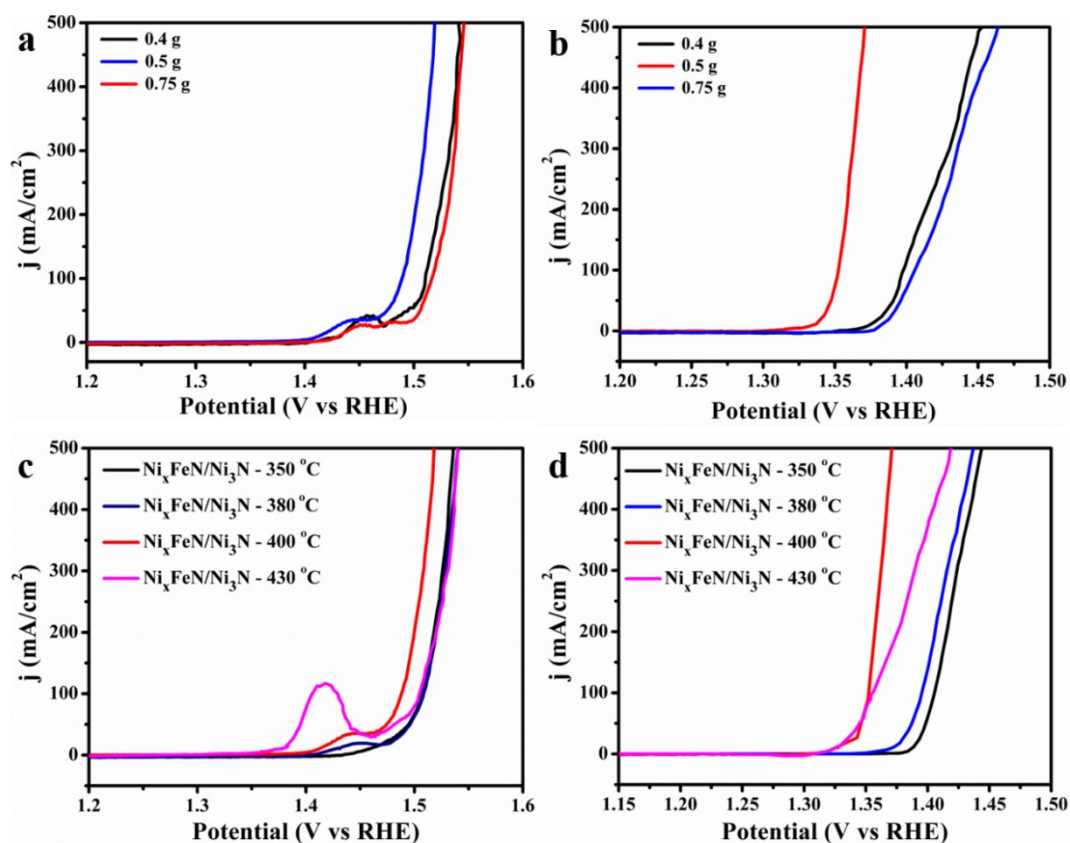

**Figure S8.** The optimization of the catalytic properties by tuning the growth conditions. (a) OER and (b) UOR properties of the  $\text{Ni}_x\text{FeN}/\text{Ni}_3\text{N}$  samples with different concentrations of  $\text{Fe}(\text{NO}_3)_3$  precursor in 5 mL ethanol solution. Temperature: 400 °C. (c) OER and (d) UOR properties of the  $\text{Ni}_x\text{FeN}/\text{Ni}_3\text{N}$  hybrids with different nitridation temperature. Precursor concentration: 0.1 g/ml.

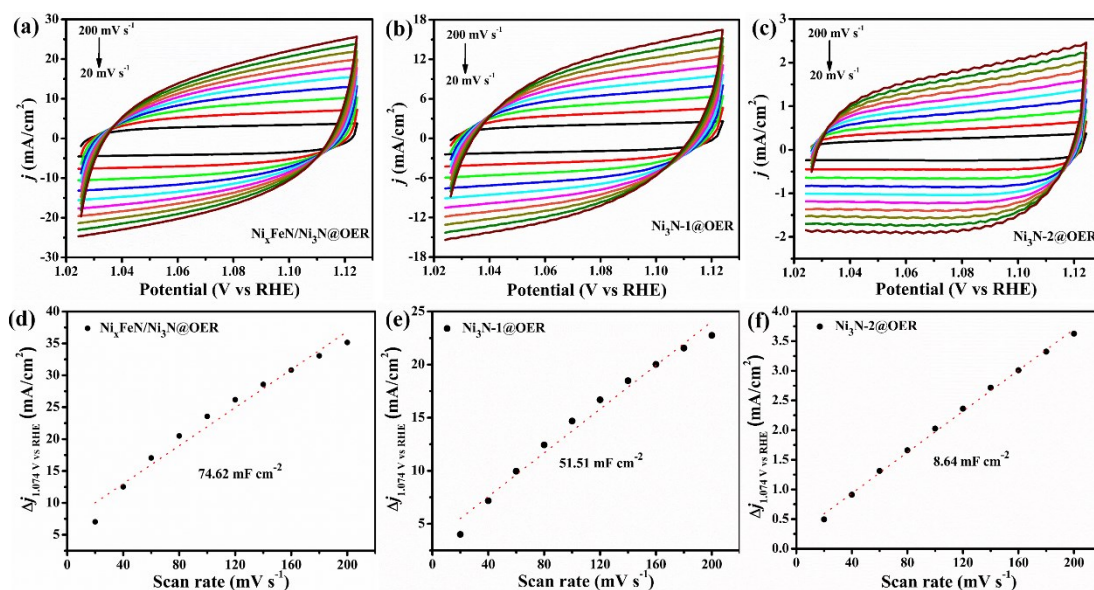

**Figure S9.** Double-layer capacitance measurements of the  $\text{Ni}_x\text{FeN}/\text{Ni}_3\text{N}$  hybrid,  $\text{Ni}_3\text{N-1}$  and pure  $\text{Ni}_3\text{N-2}$  electrodes in 1M KOH. (a-c) Typical cyclic voltammetry curves at the scan rates from 20 mV/s to 200 mV/s. (d-f) Capacitive  $\Delta J$  ( $= J_a - J_c$ ) versus the scan rates.

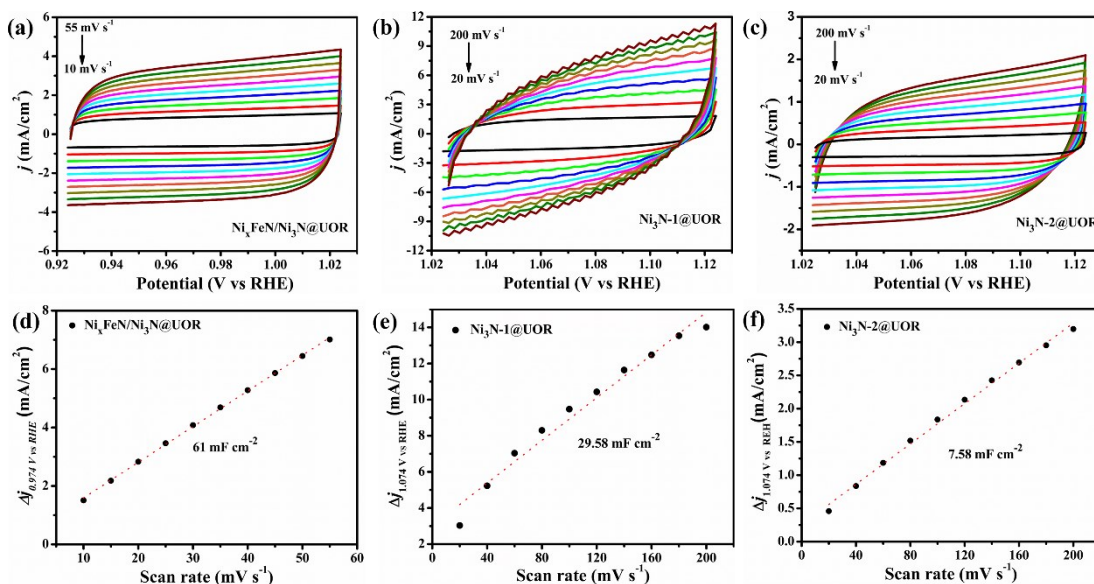

**Figure S10.** Double-layer capacitance measurements of the  $\text{Ni}_x\text{FeN}/\text{Ni}_3\text{N}$  hybrid,  $\text{Ni}_3\text{N-1}$  and pure  $\text{Ni}_3\text{N-2}$  electrodes in 1M KOH with 0.5 M urea. (a) Typical cyclic voltammetry curves at the scan rates from 10 mV s<sup>-1</sup> to 55 mV s<sup>-1</sup>. (b,c) Typical cyclic

voltammetry curves at the scan rates from  $20 \text{ mV s}^{-1}$  to  $200 \text{ mV s}^{-1}$ . (d-f) Capacitive

$\Delta J (= J_a - J_c)$  versus the scan rates.

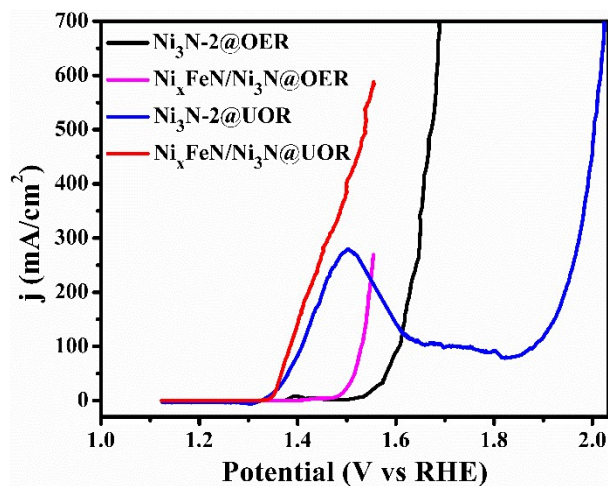

**Figure S11.** The normalized polarization curves of the  $\text{Ni}_x\text{FeN}/\text{Ni}_3\text{N}$  and pure  $\text{Ni}_3\text{N-2}$  electrodes by  $C_{dl}$  difference in 1M KOH with and without 0.5M urea.

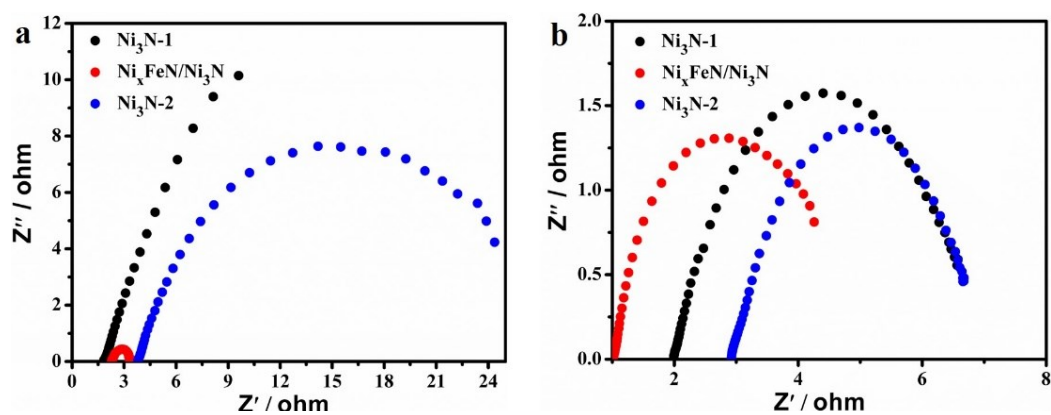

**Figure S12.** Nyquist plots of  $\text{Ni}_x\text{FeN}/\text{Ni}_3\text{N}$ ,  $\text{Ni}_3\text{N-1}$  and pure  $\text{Ni}_3\text{N-2}$  in 1M KOH (a) and 1 M KOH containing 0.5 M urea (b).

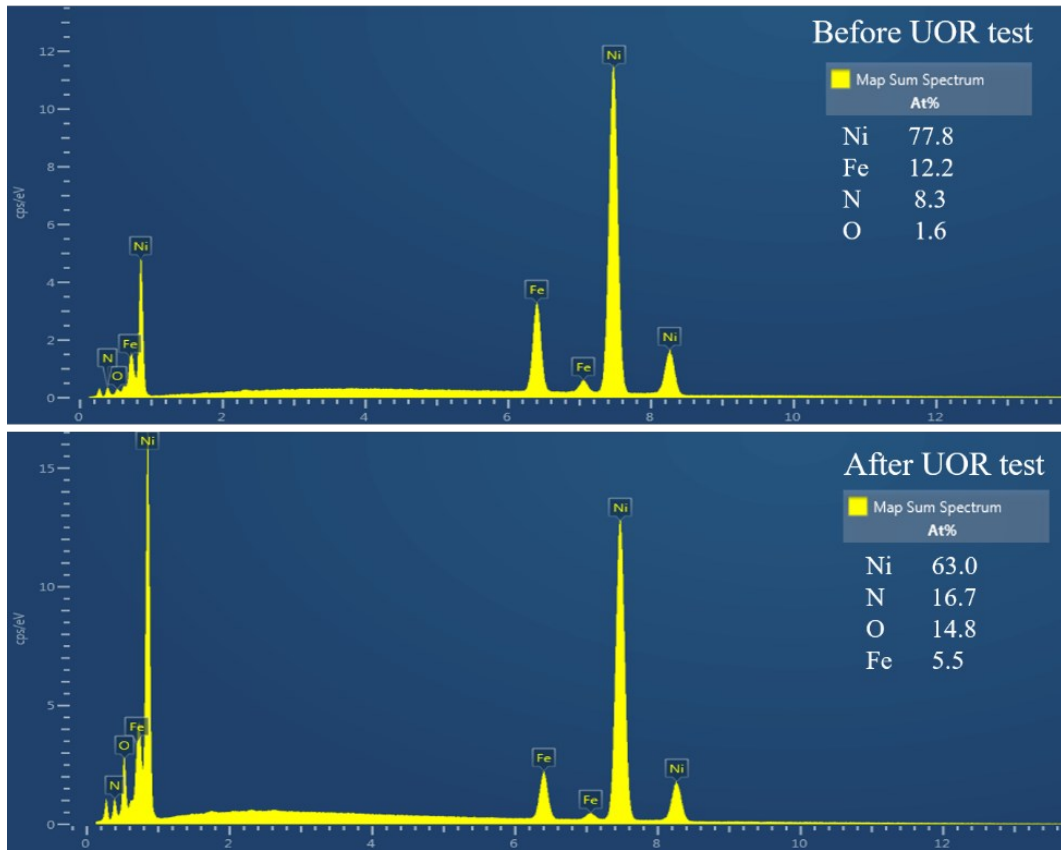

**Figure S13.** The EDX spectra of the  $\text{Ni}_x\text{FeN}/\text{Ni}_3\text{N}$  hybrid catalyst before (a) and after UOR testing (b).

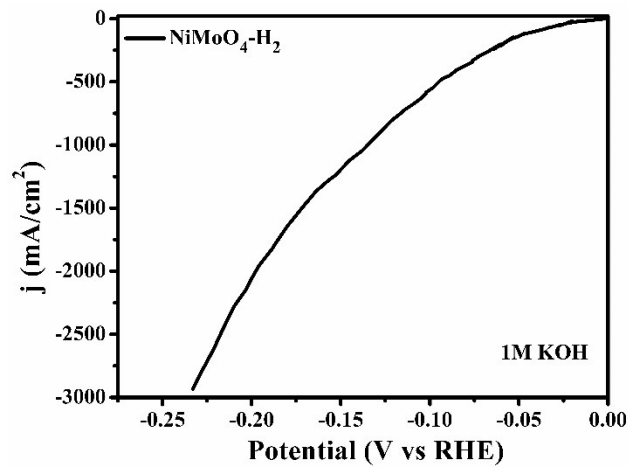

**Figure S14.** Hydrogen-evolving activity of the  $\text{NiMoO}_4\text{-H}_2$  electrocatalyst in base.

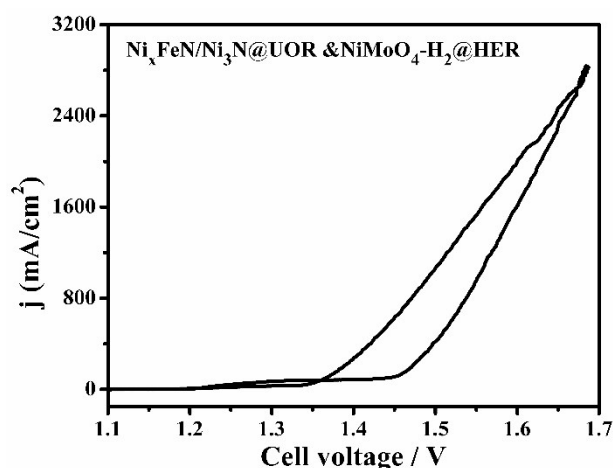

**Fig. S15.** A typical CV curve of urea electrolysis at a scan rate of  $1 \text{ mV s}^{-1}$ .

**Table S1. Comparison of the OER activity of the  $\text{Ni}_x\text{FeN}/\text{Ni}_3\text{N}$  hybrid with other available electrocatalysts reported presently.**

| Electrocatalyst                                    | OER overpotential @10 mA/cm <sup>2</sup> | OER overpotential @100 mA/cm <sup>2</sup> | Tafel slope | Ref                                                        |
|----------------------------------------------------|------------------------------------------|-------------------------------------------|-------------|------------------------------------------------------------|
| $\text{Ni}_x\text{FeN}/\text{Ni}_3\text{N}$        | ~ 211 mV                                 | 258 mV                                    | 43 mV/dec   | This work                                                  |
| NiCoFeP/C                                          | 270 mV                                   | 335 mV                                    | 65 mV/dec   | <i>Chem. Commun.</i> <b>55</b> , 10896-10899 (2019)        |
| N- $\text{Ni}_3\text{S}_2$ /NF                     | 260 mV                                   | 330 mV                                    | 70 mV/dec   | <i>Adv. Mater.</i> <b>29</b> , 1701584 (2017)              |
| $\text{Co}_2\text{P}/\text{C}$                     | 310 mV                                   | 375 mV                                    | 50 mV/dec   | <i>ACS Energy Lett.</i> <b>1</b> , 169-174 (2016)          |
| $\text{Ni}_{1.5}\text{Fe}_{0.5}\text{P}/\text{CF}$ | 264 mV                                   | 293 mV                                    | 55 mV/dec   | <i>Nano Energy</i> <b>34</b> , 472-480 (2017)              |
| NiFe LDH/Cu nanowire arrays                        | 199 mV                                   | 281 mV                                    | 28 mV/dec   | <i>Energy Environ. Sci.</i> <b>10</b> , 1820-1827 (2017)   |
| Co-P                                               | 345 mV                                   | 392 mV                                    | 47 mV/dec   | <i>Angew. Chem. Int. Ed.</i> <b>127</b> , 6349-6352 (2015) |
| $\text{Ni}_{0.7}\text{Fe}_{0.3}\text{S}_2$         | 198 mV                                   | 287 mV                                    | 56 mV/dec   | <i>J. Mater. Chem. A</i> <b>5</b> , 15838-15844 (2017)     |
| $\text{Ni}_x\text{Fe}_{1-x}\text{Se}_2$ -DO        | 195 mV                                   | 226 mV*                                   | 28 mV/dec   | <i>Nat. Commun.</i> <b>7</b> , 12324 (2016)                |
| Gelled FeCoW/Au                                    | 191 mV                                   | 265 mV*                                   | NA          | <i>Science</i>                                             |



|                                                       |        |          |           |                                                       |
|-------------------------------------------------------|--------|----------|-----------|-------------------------------------------------------|
| foam                                                  |        |          |           | <b>352</b> , 333-337 (2016)                           |
| NiSe <sub>2</sub> -Ni <sub>2</sub> P/NF               | 249 mV | 274 mV   | 45 mV/dec | <i>J. Catal.</i><br><b>377</b> , 600-608 (2019)       |
| Co <sub>0.9</sub> S <sub>0.58</sub> P <sub>0.42</sub> | 266 mV | ~ 350 mV | 48 mV/dec | <i>ACS Nano</i><br><b>11</b> , 11031-11040 (2017)     |
| NiCoP/CC                                              | 242 mV | 330 mV   | 64 mV/dec | <i>ACS Catal.</i><br><b>7</b> , 4131-4137 (2017)      |
| O-CoMoS                                               | 272 mV | 310 mV   | 71 mV/dec | <i>ACS Catal</i><br><b>8</b> , 4612-4621 (2018)       |
| Ni-Co-P HNBS                                          | 270 mV | 346 mV   | 76 mV/dec | <i>Energy Environ. Sci.</i><br><b>11</b> , 872 (2018) |
| FeP/Ni <sub>2</sub> P                                 | 154 mV | 224 mV   | 23 mV/dec | <i>Nat. Commun.</i><br><b>9</b> , 1551 (2018)         |

**Table S2. Comparison of the UOR activity of Ni<sub>x</sub>FeN/Ni<sub>3</sub>N with other reported electrocatalysts in 1M KOH.**

| Electrocatalyst                                    | UOR<br>50 mA/cm <sup>2</sup><br>(V vs RHE) | UOR<br>200 mA/cm <sup>2</sup><br>(V vs RHE) | Urea   | Ref                                                            |
|----------------------------------------------------|--------------------------------------------|---------------------------------------------|--------|----------------------------------------------------------------|
| Ni <sub>x</sub> FeN/Ni <sub>3</sub> N              | 1.347 V                                    | 1.358 V                                     | 0.5 M  | This work                                                      |
| NF/NiMoO-Ar                                        | 1.398 V                                    | 1.475 V                                     | 0.5 M  | <i>Energy Environ. Sci.</i><br><b>11</b> , 1890 (2018)         |
| Ni-Mo nanotube                                     | 1.39 V                                     | ~ 1.49 V                                    | 0.1 M  | <i>Nano Energy</i><br><b>60</b> , 894-902 (2019)               |
| NiClO-D                                            | 1.385 V                                    | 1.534 V                                     | 0.33 M | <i>Angew. Chem. Int. Ed.</i><br><b>58</b> , 16820-16825 (2019) |
| Ni <sub>2</sub> P NF/CC                            | 1.447 V                                    | 1.642 V                                     | 0.5 M  | <i>J. Mater. Chem. A</i><br><b>5</b> , 3208-3213 (2017)        |
| Ni <sub>0.9</sub> Fe <sub>0.1</sub> O <sub>x</sub> | 1.386 V                                    | 1.429 V                                     | 0.33 M | <i>Chem. Commun.</i><br><b>55</b> , 6555-6558 (2019)           |
| Ni(OH) <sub>2</sub> nanoflakes                     | 1.48 V                                     | 1.72 V                                      | 0.33 M | <i>Appl. Catal. B: Environ.</i><br><b>259</b> , 118020 (2019)  |
| NiCoP/CC                                           | 1.455 V                                    | ~ 1.70 V                                    | 0.5 M  | <i>J. Mater. Chem. A</i><br><b>7</b> , 9078-9085 (2019)        |
| S-MnO <sub>2</sub> -G-NF                           | 1.414 V                                    | 1.564 V                                     | 0.5 M  | <i>Angew. Chem. Int. Ed.</i><br><b>55</b> , 3804-3808 (2016)   |
| r-NiMoO <sub>4</sub> /NF                           | 1.405 V                                    | 1.577 V                                     | 0.5 M  | <i>ACS Catal.</i><br><b>8</b> , 1-7 (2018)                     |

|                      |        |         |       |                                                                    |
|----------------------|--------|---------|-------|--------------------------------------------------------------------|
| Ni <sub>3</sub> N/NF | 1.37 V | 1.473 V | 0.5 M | <i>ACS Appl. Mater. Interfaces.</i> <b>11</b> , 13168-13175 (2019) |
|----------------------|--------|---------|-------|--------------------------------------------------------------------|

**Table S3. Comparison of the overall water and urea electrolysis performance of our paired electrodes Ni<sub>x</sub>FeN/Ni<sub>3</sub>N<sup>(+)</sup>//NiMoO<sub>4</sub>-H<sub>2</sub><sup>(-)</sup> with other available water or urea electrolyzers reported thus far.**

| Electrolyzer configurations                                                                              | Water electrolysis @ 200 mA/cm <sup>2</sup> | Water electrolysis @ 500 mA/cm <sup>2</sup> | References                                                   |
|----------------------------------------------------------------------------------------------------------|---------------------------------------------|---------------------------------------------|--------------------------------------------------------------|
| Ni <sub>x</sub> FeN/Ni <sub>3</sub> N <sup>(+)</sup> //NiMoO <sub>4</sub> -H <sub>2</sub> <sup>(-)</sup> | 1.576 V                                     | 1.623 V                                     | This work                                                    |
| NiMoN@NiFeN <sup>(+)</sup> //NiMoN <sup>(-)</sup>                                                        | 1.610 V                                     | 1.696 V                                     | <i>Nat. Commun.</i> <b>10</b> , 5106 (2019)                  |
| Co <sub>3</sub> Mo/Cu <sup>(+/-)</sup>                                                                   | 1.680 V                                     | 1.801 V                                     | <i>Nat. Commun.</i> <b>11</b> , 2940 (2020)                  |
| CoFeZr oxides/NF <sup>(+/-)</sup>                                                                        | 1.820 V                                     | ~ 1.86 V                                    | <i>Adv. Mater.</i> <b>31</b> , 1901439 (2019)                |
| Ni <sub>3</sub> FeN/r-GO <sup>(+/-)</sup>                                                                | > 2.10 V                                    | NA                                          | <i>ACS Nano</i> <b>12</b> , 245-253 (2018)                   |
| Fe-O <sub>2</sub> cat <sup>(+)</sup> //Fe-H <sub>2</sub> cat <sup>(-)</sup>                              | 1.86 V                                      | 2.012 V                                     | <i>Chem</i> <b>4</b> , 1139-1152 (2018)                      |
| NiFe LDH/Cu nanowire arrays <sup>(+/-)</sup>                                                             | 1.785 V                                     | NA                                          | <i>Energy Environ. Sci.</i> <b>10</b> , 1820-1827 (2017)     |
| Ni <sub>0.7</sub> Fe <sub>0.3</sub> S <sub>2</sub> /Ni foam <sup>(+/-)</sup>                             | 1.91 V                                      | ~ 2.07 V                                    | <i>J. Mater. Chem. A</i> <b>5</b> , 15838-15844 (2017)       |
| np-Co <sub>1.04</sub> Fe <sub>0.96</sub> P <sup>(+/-)</sup>                                              | 1.65 V                                      | ~ 1.743 V                                   | <i>Energy Environ. Sci.</i> <b>9</b> , 2257-2261 (2016)      |
| NiFe LDH <sup>(+)</sup> //Ni@Cr <sub>2</sub> O <sub>3</sub> <sup>(-)</sup>                               | 1.670 V                                     | 1.670 V                                     | <i>Angew. Chem. Int. Ed.</i> <b>127</b> , 12157-12161 (2015) |
| NiFe LDH <sup>(+)</sup> //NiO/Ni-CNT <sup>(-)</sup>                                                      | ~ 1.667 V                                   | NA                                          | <i>Nat. Commun.</i> <b>5</b> , 4695 (2014)                   |
| Electrolyzer configurations                                                                              | Urea electrolysis @ 200 mA/cm <sup>2</sup>  | Urea electrolysis @ 500 mA/cm <sup>2</sup>  | References                                                   |
| Ni <sub>x</sub> FeN/Ni <sub>3</sub> N <sup>(+)</sup> //NiMoO <sub>4</sub> -H <sub>2</sub> <sup>(-)</sup> | 1.373 V                                     | 1.472 V                                     | This work                                                    |
| NiMoO-Ar <sup>(+)</sup> //                                                                               | 1.671 V                                     | ~ 1.85 V                                    | <i>Energy Environ. Sci.</i>                                  |

|                                                                               |           |           |                                                                      |
|-------------------------------------------------------------------------------|-----------|-----------|----------------------------------------------------------------------|
| NiMoO-H <sub>2</sub> <sup>(-)</sup>                                           |           |           | <b>11</b> , 1890-1897 (2018)                                         |
| CoFeCr LDH/NF <sup>(+)</sup><br>//Pt-C/NF <sup>(-)</sup>                      | 1.739 V   | 2.162 V   | Appl. Catal B: Environ.<br>2020, 272, 118959                         |
| Co(OH)F/NF <sup>(+)</sup> //<br>CoP/NF <sup>(-)</sup>                         | 1.648 V   | NA        | <i>J. Mater. Chem. A</i><br><b>7</b> , 3697-3703 (2019)              |
| NiMo nanotube <sup>(+/-)</sup>                                                | ~ 1.985 V | NA        | <i>Nano Energy</i><br><b>60</b> , 894-902 (2019)                     |
| Zn <sub>0.08</sub> Co <sub>0.92</sub> P/TM <sup>(+/-)</sup>                   | 2.064 V   | NA        | <i>Adv. Energy Mater.</i><br><b>7</b> , 1700020 (2017)               |
| CoS <sub>2</sub> -MoS <sub>2</sub> <sup>(+/-)</sup>                           | 1.575 V   | 1.673 V   | <i>Adv. Energy Mater.</i><br><b>8</b> , 1801775 (2018)               |
| Ni <sub>2</sub> P NF/CC <sup>(+/-)</sup>                                      | 1.820 V   | ~ 2.250 V | <i>J. Mater. Chem. A</i><br><b>5</b> , 3208-3213 (2017)              |
| Fe <sub>11.1%</sub> -Ni <sub>3</sub> S <sub>2</sub> /Ni foam <sup>(+/-)</sup> | 1.980 V   | NA        | <i>J. Mater. Chem. A</i><br><b>6</b> , 4346-4353 (2018)              |
| MoP@NiCo-LDH <sup>(+/-)</sup>                                                 | 1.544 V   | 1.809 V   | <i>J. Mater. Chem. A</i><br>DOI: 10.1039/d0ta06030e<br>(2020)        |
| Ni <sub>3</sub> N/NF <sup>(+/-)</sup>                                         | 1.501 V   | 1.705 V   | <i>ACS Appl. Mater. Interfaces</i><br><b>11</b> , 13168-13175 (2019) |
| MS-Ni <sub>2</sub> P/Ni <sub>0.96</sub> S <sup>(+/-)</sup>                    | 1.580 V   | 1.830 V   | <i>ACS Appl. Mater. Interfaces</i><br><b>12</b> , 2225-2233 (2020)   |

### Supplementary Note 1: Synthesis of the Ni<sub>3</sub>N-1 catalyst on Ni foam.

To synthesize this kind of samples, we just replaced the precursor from iron nitrate to nickel nitrate with other conditions similar to the growth of Ni<sub>x</sub>FeN/Ni<sub>3</sub>N hybrid, so as to get a similar mass loading of these two catalysts and compare the corresponding catalytic UOR or OER properties.

### Supplementary Note 2: Synthesis of the Ni<sub>3</sub>N-2 catalyst on Ni foam.

After directly treated at 400 °C in an ammonia environment (NH<sub>3</sub>: 100 sccm), the Ni foam was dipped in an ethanol solution, which was dried in air naturally. Subsequently, the pre-modified Ni foam was placed at the middle of a tube furnace

for a second nitridation under the same conditions as the  $\text{Ni}_x\text{FeN}/\text{Ni}_3\text{N}$  to gain  $\text{Ni}_3\text{N}/\text{NF}$ .
